# Supplementary material for: Hormetic Effect of Glyphosate on the Morphology, Physiology and Metabolism of Coffee Plants
Source: MDPI journal article supplement (doi:10.3390/plants12122249), 2023-06-08
Supplement: s1 [file s1]

## Supplementary Material

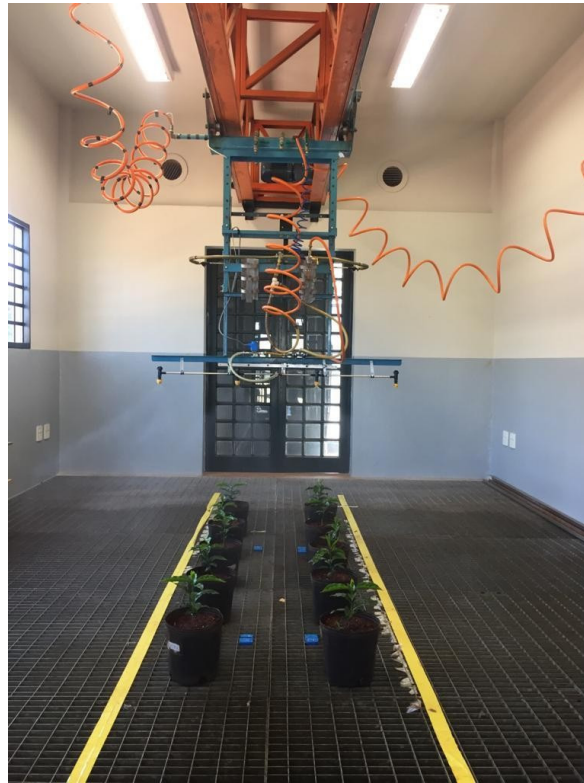

Figure S1- Application of glyphosate on coffee plants with an automated sprayer in a closed environment.

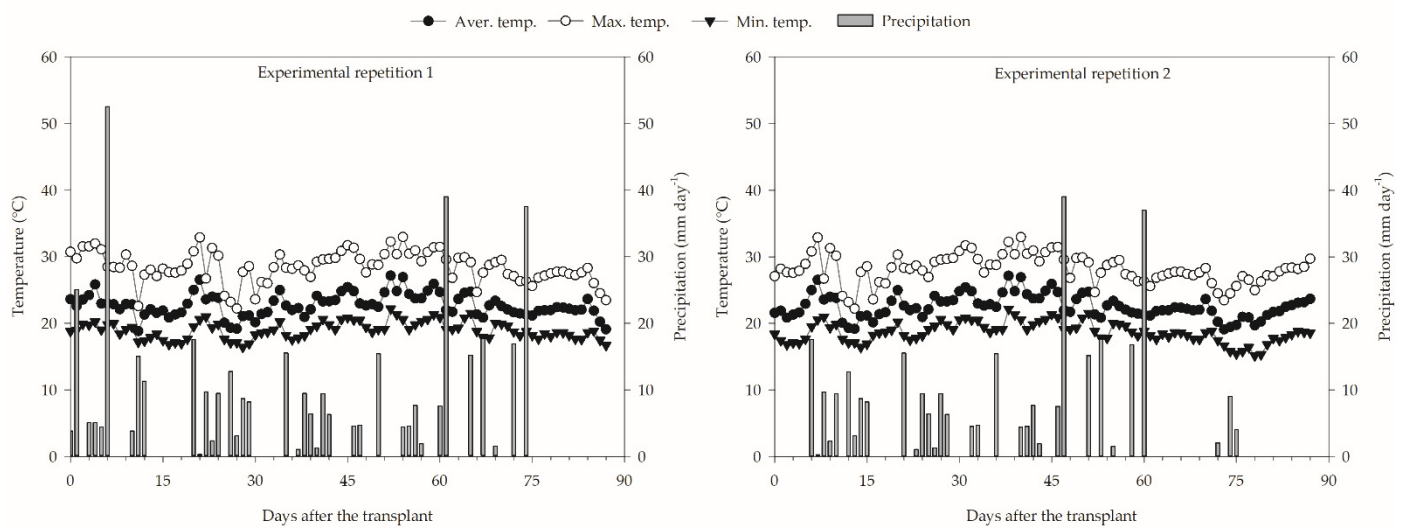

Figure S2- Average (Aver temp), minimum (Min temp) and maximum (Max temp) and daily precipitation (mm) temperatures after transplanting coffee seedlings.

**Table S1.** F values, coefficient of variation (CV), coefficient of determination ( $R^2$ ), and constants of the regression equation for number of leaves and height of coffee plant at 7, 14, 21, 28, 35, and 42 days after application (DAA) of different doses of glyphosate

|                | Leaf number                  |          |          |          |          |          | Height              |         |          |          |          |          |
|----------------|------------------------------|----------|----------|----------|----------|----------|---------------------|---------|----------|----------|----------|----------|
|                | Days after application (DAA) |          |          |          |          |          |                     |         |          |          |          |          |
|                | 7                            | 14       | 21       | 28       | 35       | 42       | 7                   | 14      | 21       | 28       | 35       | 42       |
| Doses          | 2.931**                      | 10.009** | 17.803** | 18.725** | 41.490** | 66.855** | 1.561 <sup>ns</sup> | 6.507** | 13.771** | 22.745** | 35.108** | 41.030** |
| Hypothesis f≠0 | -0.584                       | 2.490    | 4.865    | 1.723    | 8.991    | 12.127   | --                  | 0.883   | 3.211    | 4.898    | 8.053    | 11.095   |
| Model          | 2                            | 2        | 1        | 2        | 1        | 1        | --                  | 2       | 2        | 1        | 1        | 1        |
| Regression     | 7.88**                       | 27.16**  | 38.15**  | 54.88**  | 91.62**  | 148.45** | --                  | 18.03** | 38.14**  | 49.74**  | 78.24**  | 90.82**  |
| R <sup>2</sup> | 0.90                         | 0.90     | 0.92     | 0.98     | 0.98     | 0.99     | --                  | 0.92    | 0.92     | 0.97     | 0.99     | 0.98     |
| Constants      |                              |          |          |          |          |          |                     |         |          |          |          |          |
| b              | 0.59                         | 0.66     | 1.27     | 1.53     | 2.36     | 2.98     | --                  | 0.80    | 0.84     | 1.36     | 1.42     | 1.65     |
| c              | 12.55                        | 12.30    | 9.85     | 13.48    | 13.34    | 13.38    | --                  | 13.80   | 13.19    | 12.47    | 12.06    | 14.41    |
| d              | 16.72                        | 18.54    | 20.31    | 22.44    | 23.00    | 26.73    | --                  | 21.43   | 23.90    | 24.35    | 25.76    | 26.99    |
| e              | 1442.36                      | 344.90   | 12.14    | 91.08    | 46.45    | 61.47    | --                  | 749.91  | 409.66   | 32.55    | 40.06    | 44.32    |
| f              | --                           | --       | 1.00     | --       | 0.22     | 0.20     | --                  | --      | --       | 0.40     | 0.40     | 0.36     |
| CV (%)         | 10.48                        | 11.25    | 13.78    | 15.70    | 14.03    | 14.23    | 16.05               | 13.47   | 14.31    | 13.42    | 12.46    | 12.61    |

<sup>ns</sup> not significant; \*\*, \* Significant at 1 and 5% probability by the f test, respectively.

**Table S2.** F values, coefficient of variation (CV), coefficient of determination ( $R^2$ ), and constants of the regression equation for leaf (LDM), stem (SDM), and total (TDM) dry mass and leaf area (LA) of coffee plants at 42 days after application of different doses of glyphosate.

|                       | LDM      | SDM     | TDM     | LA       |
|-----------------------|----------|---------|---------|----------|
| Doses                 | 61.49**  | 22.23** | 53.53** | 97.74**  |
| Hypothesis $f \neq 0$ | 23.34    | 8.57    | 21.778  | 31.50    |
| Model                 | 1        | 1       | 1       | 1        |
| Regression            | 135.98** | 48.11** | 117.6** | 217.92** |
| $R^2$                 | 0.98     | 0.96    | 0.98    | 0.99     |
| <b>Constants</b>      |          |         |         |          |
| b                     | 1.49     | 1.14    | 1.42    | 2.14     |
| c                     | 1.94     | -1.39   | 2.26    | 313.97   |
| d                     | 7.35     | 2.58    | 9.92    | 975.98   |
| e                     | 31.91    | 21.72   | 30.47   | 39.96    |
| f                     | 0.23     | 0.23    | 0.34    | 21.59    |
| CV (%)                | 16.13    | 23.08   | 16.65   | 16.86    |

<sup>ns</sup> not significant; \*\*, \* Significant at 1 and 5% probability by the f test, respectively

**Table S3.** F values, coefficient of variation (CV), coefficient of determination (R<sup>2</sup>), and constants of the regression equation for CO<sub>2</sub> assimilation (A), transpiration (E), stomatal conductance (gs) and internal concentration of CO<sub>2</sub> (Ci), carboxylation efficiency (A/Ci), effective and intrinsic water use efficiency (EWUE and IWUE), and ETR/A ratio of coffee plants at 7, 21, and 42 days after application (DAA) of different glyphosate doses.

|                | plants at 7, 21, and 35 days after application (DAA) of different gypsum doses. |          |          |          |         |         |          |          |         |         |         |         |
|----------------|---------------------------------------------------------------------------------|----------|----------|----------|---------|---------|----------|----------|---------|---------|---------|---------|
|                | A                                                                               |          |          | E        |         |         | gS       |          |         | Ci      |         |         |
|                | Days after application (DAA)                                                    |          |          |          |         |         |          |          |         |         |         |         |
|                | 7                                                                               | 21       | 35       | 7        | 21      | 35      | 7        | 21       | 35      | 7       | 21      | 35      |
| Doses          | 190.07**                                                                        | 182.77** | 102.87** | 78.83**  | 35.24** | 29.07** | 37.69**  | 45.86**  | 26.47** | 89.80** | 24.30** | 25.42** |
|                | 55.32                                                                           | 164.59   | 106.36   | 49.00    | 21.17   | 12.05   | 56.61    | 27.99    | 8.31    | --      | --      | --      |
| Hypothesis f≠0 |                                                                                 |          |          |          |         |         |          |          |         |         |         |         |
| Model          | 1                                                                               | 1        | 1        | 1        | 1       | 1       | 1        | 1        | 1       | --      | --      | --      |
|                | 410.07**                                                                        | 400.01** | 227.39*  | 155.52** | 75.76   | 64.77** | 79.01**  | 94.57*   | 58.26** | --      | --      | --      |
| Regression R²  | 0.96                                                                            | 0.97     | 0.98     | 0.88     | 0.96    | 0.99    | 0.93     | 0.92     | 0.98    | --      | --      | --      |
| Constants      |                                                                                 |          |          |          |         |         |          |          |         |         |         |         |
| b              | 1.13                                                                            | 1.18     | 1.83     | 1.09     | 1.14    | 2.12    | 1.32     | 1.30     | 1.96    | --      | --      | --      |
| c              | -8.21                                                                           | -7.85    | 0.87     | -2.43    | -0.89   | 0.79    | 27.70    | 32.97    | 25.87   | --      | --      | --      |
| d              | 5.04                                                                            | 5.85     | 4.28     | 2.81     | 2.66    | 2.03    | 66.07    | 72.72    | 53.31   | --      | --      | --      |
| e              | 15.94                                                                           | 12.06    | 28.26    | 5.01     | 10.45   | 32.28   | 3.43     | 14.13    | 32.06   | --      | --      | --      |
| f              | 1.03                                                                            | 1.77     | 0.29     | 1.30     | 0.44    | 0.06    | 28.55    | 4.06     | 1.34    | --      | --      | --      |
| CV (%)         | 14.02                                                                           | 14.80    | 18.86    | 10.83    | 17.05   | 28.14   | 14.92    | 10.57    | 22.38   | 7.17    | 17.15   | 18.47   |
|                | A/Ci                                                                            |          |          | EWUE     |         |         | IWUE     |          |         | ETR/A   |         |         |
|                | 7                                                                               | 21       | 35       | 7        | 21      | 35      | 7        | 21       | 35      | 7       | 21      | 35      |
| Doses          | 169.46**                                                                        | 14.31**  | 41.22**  | 103.29** | 21.26** | 1.80ns  | 68.32**  | 96.77**  | 6.28**  | 35.16** | 68.70** | 21.45** |
|                | -9.97                                                                           | 19.77    | 63.49    | 0.001    | 0.83    | --      | 0.15     | 9.05     | 5.61    | --      | --      | --      |
| Hypothesis f≠0 |                                                                                 |          |          |          |         |         |          |          |         |         |         |         |
| Model          | 2                                                                               | 1        | 1        | 2        | 2       | --      | 2        | 1        | 1       | --      | --      | --      |
|                | 482.94**                                                                        | 29.66**  | 91.06**  | 306.10** | 58.76** | --      | 203.03** | 205.35** | 13.87** | --      | --      | --      |
| Regression R²  | 0.95                                                                            | 0.92     | 0.98     | 0.99     | 0.93    | --      | 0.99     | 0.94     | 0.98    | --      | --      | --      |
| Constants      |                                                                                 |          |          |          |         |         |          |          |         |         |         |         |
| b              | 1.61                                                                            | 1.57     | 1.98     | 3.37     | 3.17    | --      | 3.34     | 1.91     | 1.36    | --      | --      | --      |
| c              | -0.0005                                                                         | 0.0004   | 0.0003   | 0.28     | 0.68    | --      | 0.01     | 0.004    | 0.01    | --      | --      | --      |
| d              | 0.02                                                                            | 0.03     | 0.01     | 1.92     | 2.85    | --      | 0.08     | 0.10     | 0.08    | --      | --      | --      |
| e              | 362.79                                                                          | 14.76    | 25.92    | 535.65   | 534.92  | --      | 573.30   | 243.45   | 40.67   | --      | --      | --      |
| f              | --                                                                              | 0.006    | 0.002    | --       | --      | --      | --       | 0.0003   | 0.003   | --      | --      | --      |
| CV (%)         | 15.62                                                                           | 64.84    | 42.49    | 15.25    | 29.69   | 53.08   | 18.84    | 16.90    | 39.82   | 53.77   | 48.33   | 46.19   |

ns not significant; \*\*, \* Significant at 1 and 5% probability by the f test, respectively

**Table S4.** F values, coefficient of variation (CV), coefficient of determination ( $R^2$ ), and constants of the regression equation for the electron transport rate (ETR) and effective photochemical efficiency of photosystem II ( $\Phi_{PSII}$ ) of coffee plants at 7, 14, 21, 28, 35, and 42 days after application (DAA) of different doses of glyphosate

|                           | ETR                          |         |          |         |         |         | Φ <sub>PSII</sub> |         |         |         |         |         |
|---------------------------|------------------------------|---------|----------|---------|---------|---------|-------------------|---------|---------|---------|---------|---------|
|                           | Days after application (DAA) |         |          |         |         |         |                   |         |         |         |         |         |
|                           | 7                            | 14      | 21       | 28      | 35      | 42      | 7                 | 14      | 21      | 28      | 35      | 42      |
| Doses                     | 31.98**                      | 29.29** | 38.38**  | 18.05** | 10.84** | 36.90** | 31.98**           | 29.29** | 38.38** | 18.05** | 10.84** | 36.90** |
|                           | 9.11                         | 10.03   | 0.56     | 9.76    | 12.13   | 15.55   | 8.079             | 10.02   | -4.29   | 9.56    | 12.13   | 15.55   |
| Hypothesis f≠0            |                              |         |          |         |         |         |                   |         |         |         |         |         |
| Model                     | 1                            | 1       | 2        | 1       | 1       | 1       | 1                 | 1       | 2       | 1       | 1       | 1       |
|                           | 69.28**                      | 64.01** | 109.25** | 39.42** | 23.68** | 81.22** | 69.02**           | 64.01** | 80.73** | 39.37** | 23.38** | 81.21** |
| Regression R <sup>2</sup> | 0.96                         | 0.97    | 0.95     | 0.97    | 0.97    | 0.98    | 0.96              | 0.97    | 0.95    | 0.97    | 0.97    | 0.98    |
| Constants                 |                              |         |          |         |         |         |                   |         |         |         |         |         |
| b                         | 1.06                         | 1.36    | 0.85     | 1.10    | 1.52    | 1.20    | 1.20              | 1.38    | 0.90    | 1.17    | 1.53    | 1.21    |
| c                         | -148.70                      | 30.17   | -46.19   | -2.26   | 34.26   | 14.89   | -0.09             | 0.149   | -0.10   | 0.09    | 0.16    | 0.07    |
| d                         | 44.11                        | 65.82   | 62.78    | 53.61   | 45.54   | 59.51   | 0.21              | 0.313   | 0.30    | 0.26    | 0.22    | 0.28    |
| e                         | 75.13                        | 42.15   | 10829.3  | 23.37   | 28.54   | 23.08   | 93.52             | 43.43   | 6717.30 | 28.67   | 28.83   | 23.33   |
| f                         | 2.76                         | 1.09    | --       | 2.88    | 0.87    | 2.52    | 0.004             | 0.005   | --      | 0.01    | 0.004   | 0.01    |
| CV (%)                    | 15.55                        | 12.34   | 8.21     | 10.09   | 12.99   | 10.69   | 15.55             | 12.34   | 8.21    | 10.09   | 12.99   | 10.69   |

<sup>ns</sup> not significant; \*\*, \* Significant at 1 and 5% probability by the f test, respectively

**Table S5.** F values and coefficient of variation (CV) for the concentration of glyphosate, shikimic, ferulic, benzoic, and chlorogenic acids and of the aromatic amino acids tyrosine, phenylalanine, and tryptophan in coffee plants at 7, 21, and 42 days after application (DAA) of different doses of glyphosate

|                | application (DAA) of different doses of glyphosate |         |         |               |         |        |              |         |        |              |         |        |
|----------------|----------------------------------------------------|---------|---------|---------------|---------|--------|--------------|---------|--------|--------------|---------|--------|
|                | Glyphosate                                         |         |         | Shikimic acid |         |        | Ferulic acid |         |        | Benzoic acid |         |        |
|                | Days after application (DAA)                       |         |         |               |         |        |              |         |        |              |         |        |
|                | 7                                                  | 21      | 42      | 7             | 21      | 42     | 7            | 21      | 42     | 7            | 21      | 42     |
| Doses          | 34,60**                                            | 43,39** | 16,67** | 50,83**       | 19,34** | 7,26** | 2,40*        | 3,98**  | 9,69** | 5,14**       | 1,97ns  | 0,76ns |
|                | --                                                 | --      | --      | --            | --      | --     | --           | --      | --     | --           | --      | --     |
| Hypothesis f≠0 |                                                    |         |         |               |         |        |              |         |        |              |         |        |
| Model          | --                                                 | --      | --      | --            | --      | --     | --           | --      | --     | --           | --      | --     |
|                | --                                                 | --      | --      | --            | --      | --     | --           | --      | --     | --           | --      | --     |
| Regression R²  | --                                                 | --      | --      | --            | --      | --     | --           | --      | --     | --           | --      | --     |
| CV (%)         | 74,70                                              | 66,12   | 98,96   | 54,23         | 73,56   | 45,82  | 29,08        | 41,56   | 39,19  | 24,77        | 24,77   | 25,75  |
|                | Chlorogenic acid                                   |         |         | Phenylalanine |         |        | Tyrosine     |         |        | Tryptophan   |         |        |
|                | Days after application (DAA)                       |         |         |               |         |        |              |         |        |              |         |        |
|                | 7                                                  | 21      | 42      | 7             | 21      | 42     | 7            | 21      | 42     | 7            | 21      | 42     |
| Doses          | 1,34ns                                             | 0,96ns  | 2,63*   | 6,58**        | 21,81** | 5,33** | 5,51**       | 65,68** | 7,60** | 10,72**      | 16,79** | 2,01ns |
|                | --                                                 | --      | --      | --            | --      | --     | --           | --      | --     | --           | --      | --     |
| Hypothesis f≠0 |                                                    |         |         |               |         |        |              |         |        |              |         |        |
| Model          | --                                                 | --      | --      | --            | --      | --     | --           | --      | --     | --           | --      | --     |
|                | --                                                 | --      | --      | --            | --      | --     | --           | --      | --     | --           | --      | --     |
| Regression R²  | --                                                 | --      | --      | --            | --      | --     | --           | --      | --     | --           | --      | --     |
| CV (%)         | 14,83                                              | 14,83   | 16,52   | 16,86         | 19,75   | 16,36  | 65,45        | 26,08   | 33,97  | 42,28        | 36,29   | 31,42  |

<sup>ns</sup> not significant; \*\*, \* Significant at 1 and 5% probability by the f test, respectively

**Table S6.** F values, coefficient of variation (CV), coefficient of determination (R<sup>2</sup>), and constants of the regression equation for the concentration of quinic, salicylic, caffeic, and coumaric acids in coffee plants at 7, 21, and 42 days after application (DAA) of different doses of glyphosate

|                | Doses of glyphosate          |         |         |                |        |         |              |         |        |               |         |         |
|----------------|------------------------------|---------|---------|----------------|--------|---------|--------------|---------|--------|---------------|---------|---------|
|                | Quinic acid                  |         |         | Salicylic acid |        |         | Caffeic acid |         |        | Coumaric acid |         |         |
|                | Days after application (DAA) |         |         |                |        |         |              |         |        |               |         |         |
|                | 7                            | 21      | 42      | 7              | 21     | 42      | 7            | 21      | 42     | 7             | 21      | 42      |
| Doses          | 5.18**                       | 13.30** | 31.27** | 5.96**         | 3.84** | 24.82** | 3.31**       | 3.98**  | 4.15** | 11.56**       | 9.24**  | 10.38** |
|                | 20.96                        | 0.02    | 3.14    | 17.90          | 3.55   | 13.65   | --           | 1.76    | 5.86   | 54.58         | 7.08    | 3.56    |
| Hypothesis f≠0 |                              |         |         |                |        |         |              |         |        |               |         |         |
| Model          | 1                            | 2       | 2       | 1              | 2      | 1       | --           | 2       | 1      | 1             | 1       | 2       |
|                | 11.36**                      | 38.98** | 91.37** | 13.03**        | 9.70** | 53.61** | --           | 11.17** | 8.26** | 24.82**       | 20.15** | 28.57** |
| Regression     |                              |         |         |                |        |         |              |         |        |               |         |         |
| R <sup>2</sup> | 0.98                         | 0.98    | 0.97    | 0.97           | 0.84   | 0.96    | --           | 0.94    | 0.88   | 0.95          | 0.97    | 0.92    |
| Constants      |                              |         |         |                |        |         | --           |         |        |               |         |         |
| b              | 1.79                         | 1.08    | 1.87    | 1.72           | 1.30   | 1.21    | --           | 4.31    | 2.57   | 1.92          | 2.02    | 1.16    |
| c              | 1516.43                      | 1834.97 | 428.60  | 0.38           | 0.55   | -0.31   | --           | 4.13    | 2.27   | 1.55          | 1.39    | 1.07    |
| d              | 1672.73                      | 5115.95 | 2431.60 | 0.55           | 1.36   | 0.63    | --           | 8.66    | 3.95   | 1.75          | 6.14    | 3.47    |
| e              | 4.24                         | 306.53  | 197.37  | 10.20          | 518.61 | 7.30    | --           | 379.45  | 224.21 | 2.88          | 85.15   | 220.91  |
| f              | 1136.21                      | --      | --      | 0.18           | --     | 0.20    | --           | --      | 0.02   | 5.82          | 0.11    | --      |
| CV (%)         | 30.90                        | 18.72   | 22.62   | 44.79          | 31.07  | 26.19   | 32.28        | 34.08   | 31.26  | 38.32         | 38.40   | 26.49   |

<sup>ns</sup> not significant; \*\*, \* Significant at 1 and 5% probability by the f test, respectively
